# Supplementary material for: Casiopeinas® as SARS-CoV-2 main protease (Mpro) inhibitors: a combined DFT, molecular docking and ONIOM approach
Source: Royal Society of Chemistry journal article supplement (doi:10.1039/d2nj01480g), 2022-01-01

## Casiopeinas® as SARS-CoV-2 main protease (M<sup>Pro</sup>) inhibitors. A combined DFT, molecular docking and ONIOM approach

Miguel Reina, Luis Gabriel Talavera-Contreras, Yeshenia Figueroa-De Paz, Lena Ruiz-Azuara, Luis Felipe Hernández-Ayala\*

| Index                                                                                                                                                 | Page  |
|-------------------------------------------------------------------------------------------------------------------------------------------------------|-------|
| Table S1. Selected experimental and DFT (M06/LanL2DZ) estimated bond distances and angles of cooper compounds.                                        | 1-3   |
| Figure S1. Optimized structures of the compounds.                                                                                                     | 3-5   |
| Table S2. Binding affinities, inhibition constants for docked M <sup>Pro</sup> -ligand adducts.                                                       | 6     |
| Figure S2. Estimated energy binding of Cas-M <sup>Pro</sup> complexes.                                                                                | 7     |
| Figure S3. 2D Diagrams of stabilizing interactions of 2-aminomethylbencimidazol and indomethacin derivatives with M <sup>Pro</sup> active site.       | 7-8   |
| Figure S4. 2D Diagrams of stabilizing interactions of some best rated copper compounds.                                                               | 8-9   |
| Figure S5. Stabilizing interactions in CasII-dmCu:M <sup>Pro</sup> .                                                                                  | 9     |
| Figure S6. Close-ups of the ONIOM high layer for the complexes of M <sup>Pro</sup> <sub>pocket</sub> with a) CasIV-sa, b) CasII-tyr and c) CasIV-ambz | 10-11 |

**Table S1.** Selected experimental and DFT (M06/LanL2DZ) estimated bond distances and angles of cooper compounds.

| [Cu(indomethacin) <sub>2</sub> (2,2'-bipyridine)] |                                                                                     |                                                                                      |        |
|---------------------------------------------------|-------------------------------------------------------------------------------------|--------------------------------------------------------------------------------------|--------|
|                                                   | X-Ray Diffraction Structure <sup>1</sup>                                            | Optimized Structure                                                                  |        |
|                                                   | 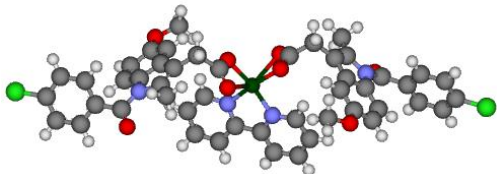 |  |        |
| Bond/Distance                                     | Experimental (Å/degrees)                                                            | DFT (Å/degrees)                                                                      | %Error |
| Cu-N                                              | 1.997                                                                               | 2.009                                                                                | 0.60   |
| Cu-N'                                             | 1.997                                                                               | 2.009                                                                                | 0.60   |
| Cu-O                                              | 1.967                                                                               | 1.956                                                                                | 0.56   |

|            |        |        |      |
|------------|--------|--------|------|
| Cu-O'      | 2.551  | 2.586  | 1.37 |
| Cu-O''     | 1.967  | 1.969  | 0.10 |
| Cu-O'''    | 2.551  | 2.666  | 4.51 |
| N-Cu-N'    | 80.41  | 80.83  | 0.52 |
| O-Cu-O'    | 94.69  | 93.28  | 1.49 |
| N-Cu-O     | 92.84  | 93.08  | 0.26 |
| N'-Cu-O'   | 92.84  | 93.68  | 0.90 |
| O'''-Cu-O' | 135.50 | 143.05 | 5.57 |
| N'-Cu-O    | 170.20 | 169.94 | 0.15 |

<sup>1</sup> A. Tarushi, C. P. Raptopoulou, V. Psycharis, D. P. Kessissoglou, A. N. Papadopoulos and G. Psomas, *J. Inorg. Biochem.*, 2014, 140, 185-198.

**[Cu(acetylacetonate)(4,4'-dimethyl-2,2'-bipyridine)]NO<sub>3</sub>**

X-Ray Diffraction Structure<sup>2</sup>

Optimized Structure

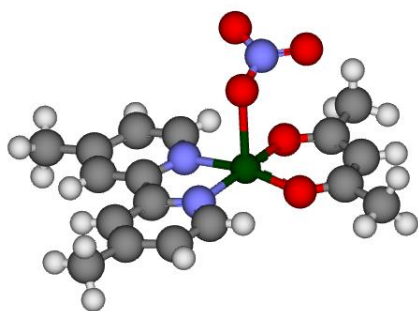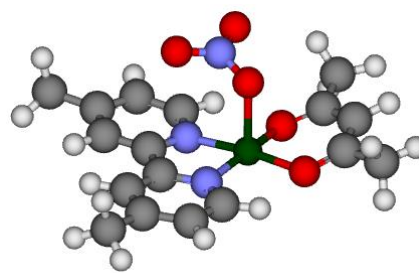

| Bond/Distance | Experimental (Å/degrees) | DFT (Å/degrees) | %Error |
|---------------|--------------------------|-----------------|--------|
| Cu-N          | 1.995                    | 1.995           | 0.00   |
| Cu-N'         | 1.967                    | 1.991           | 1.22   |
| Cu-L          | 1.906                    | 1.940           | 1.78   |
| Cu-L'         | 1.911                    | 1.945           | 1.78   |
| N-Cu-N'       | 81.28                    | 81.57           | 0.36   |
| L-Cu-L'       | 94.98                    | 93.01           | 2.07   |
| N-Cu-L        | 91.02                    | 91.80           | 0.86   |
| N'-Cu-L'      | 91.83                    | 93.08           | 1.36   |
| N-Cu-L'       | 168.24                   | 170.37          | 1.27   |
| N'-Cu-L       | 171.49                   | 173.34          | 1.08   |

<sup>2</sup> A. Tovar-Tovar, L. Ruiz-Ramirez, A. Campero, A. Romerosa, R. Moreno-Esparza, M. J. Rosales-Hoz, *J. Inorg. Biochem.*, 2004, 98, 6, 1045-1053.

**[Cu(salicylaldehyde)(1,10-phenanthroline)NO<sub>3</sub>]<sub>2</sub>**

X-Ray Diffraction Structure<sup>3</sup>

Optimized Structure

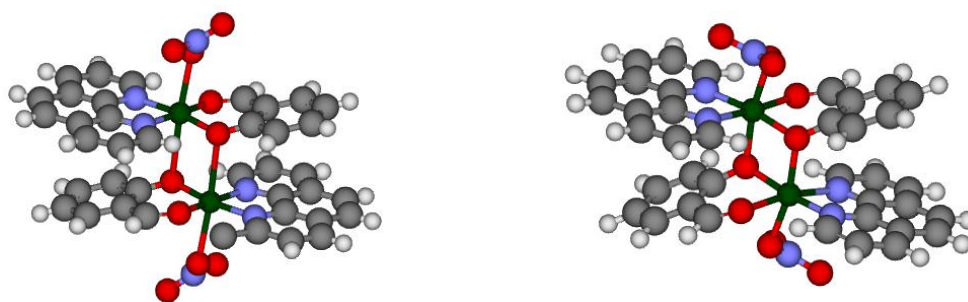

| Bond/Distance | Experimental (Å/degrees) | DFT (Å/degrees) | %Error |
|---------------|--------------------------|-----------------|--------|
| Cu-N          | 1.999                    | 1.978           | 1.05   |
| Cu-N'         | 2.000                    | 2.258           | 12.90  |
| Cu-L          | 1.895                    | 1.960           | 3.43   |
| Cu-L'         | 1.953                    | 2.355           | 20.58  |
| N-Cu-N'       | 82.08                    | 79.65           | 2.96   |
| L-Cu-L'       | 93.38                    | 82.81           | 11.32  |
| N-Cu-L        | 91.96                    | 97.21           | 5.71   |
| N'-Cu-L'      | 92.94                    | 100.64          | 8.28   |
| N-Cu-L'       | 171.42                   | 170.63          | 0.46   |
| N'-Cu-L       | 173.70                   | 176.20          | 1.44   |

<sup>3</sup> X. Solans, L. Ruiz-Ramírez, L. Gasque and J. L. Briansó, *Acta Cryst.*, 1987, C43, 428-430

**Figure S1.** Compounds optimized (M06/LanL2Dz) structures.

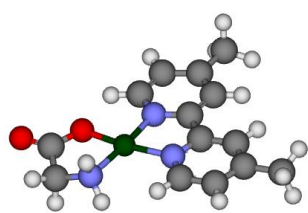

CasIVgly

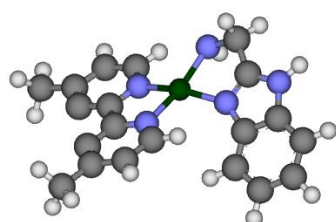

CasIV-ambz

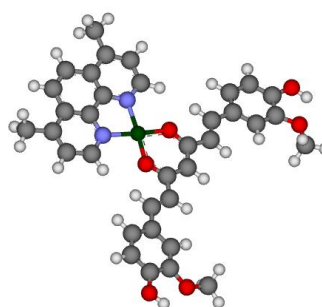

CasII-cu

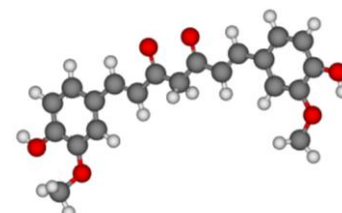

Curcumin

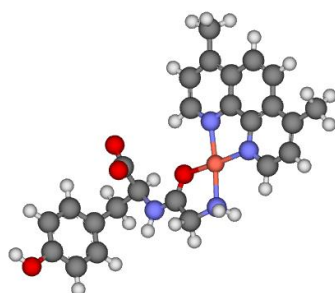

CasII-GY

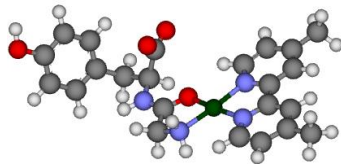

CasIV-GY

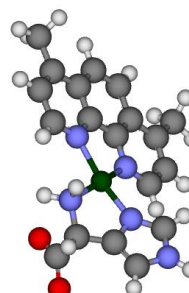

CasII-his

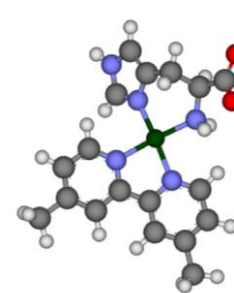

CasIV-his

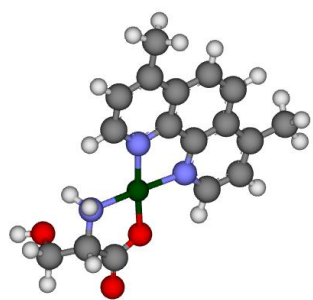

CasII-ser

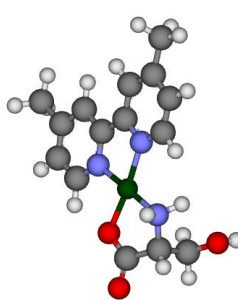

CasIV-ser

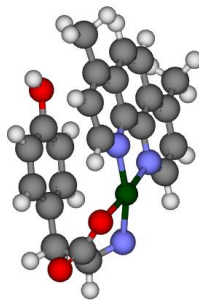

CasII-tyr

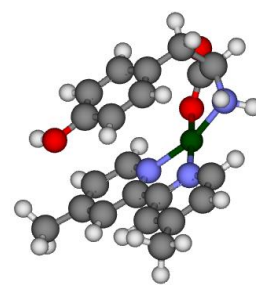

CasIV-tyr

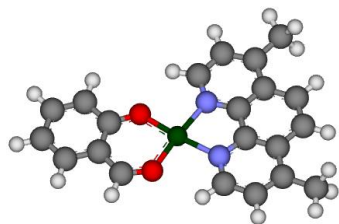

CasII-sa

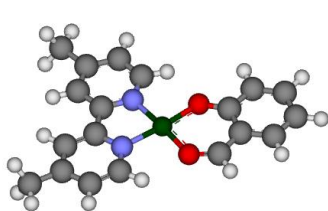

CasIV-sa

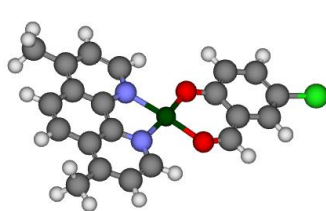

CasII-(5Cl)sa

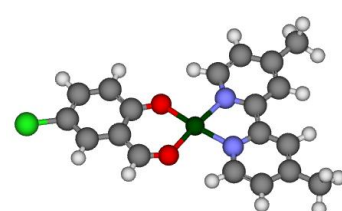

CasIV-(5Cl)sa

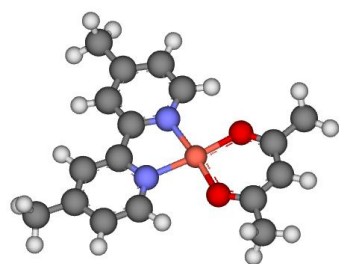

CasIII-ia

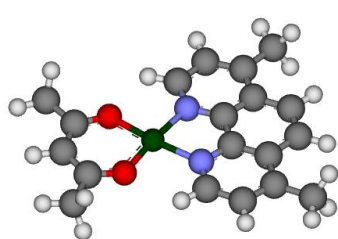

CasIII-Ea

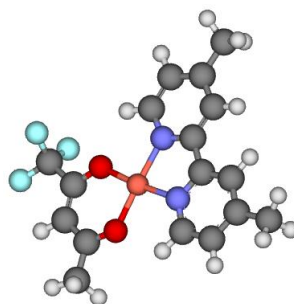

CasIII-ia(tfa)

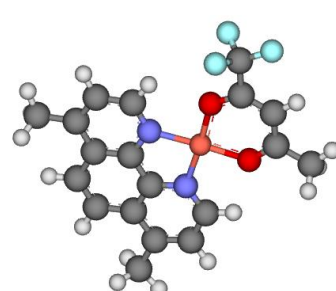

CasIII-Ea(tfa)

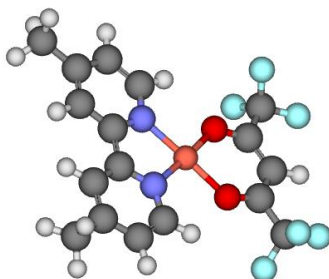

CasIII-ia(hfa)

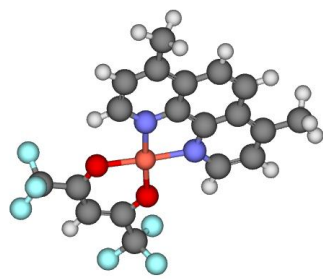

CasIII-Ea(hfa)

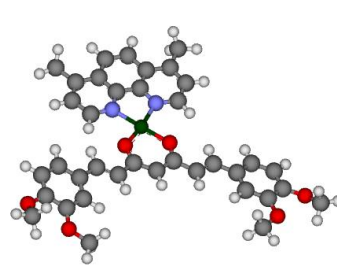

CasII-dmCu

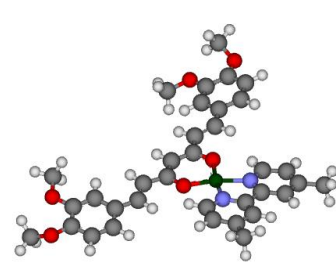

CasIV-dmCu

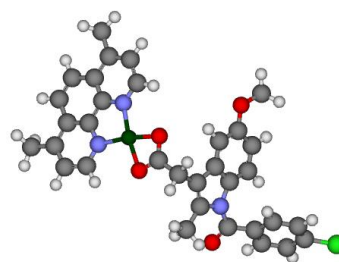

CasII-in

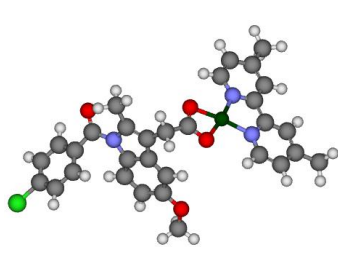

CasIV-in

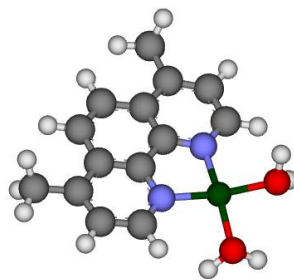

[Cu(47dmphen)(H<sub>2</sub>O)<sub>2</sub>]<sup>2+</sup>

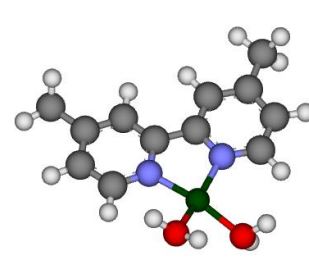

[Cu(44dmbp)(H<sub>2</sub>O)<sub>2</sub>]<sup>2+</sup>

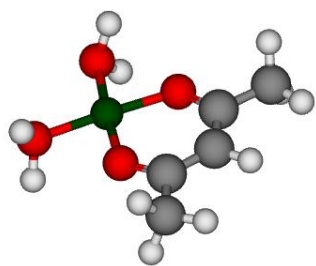

[Cu(acac)(H<sub>2</sub>O)<sub>2</sub>]<sup>2+</sup>

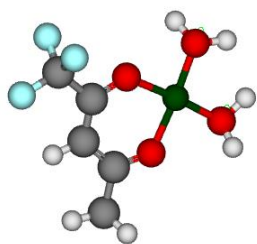

[Cu(tfa)(H<sub>2</sub>O)<sub>2</sub>]<sup>2+</sup>

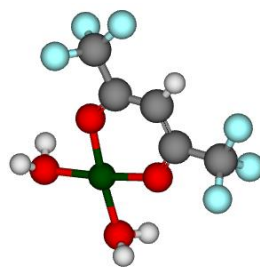

[Cu(hfa)(H<sub>2</sub>O)<sub>2</sub>]<sup>2+</sup>

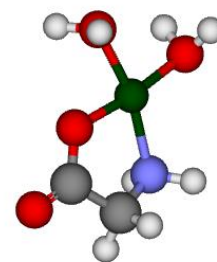

[Cu(gly)(H<sub>2</sub>O)<sub>2</sub>]<sup>2+</sup>

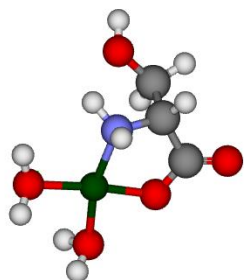

[Cu(ser)(H<sub>2</sub>O)<sub>2</sub>]<sup>2+</sup>

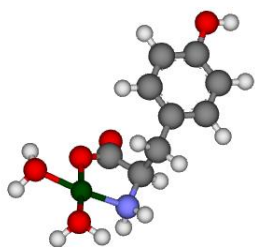

[Cu(tyr)(H<sub>2</sub>O)<sub>2</sub>]<sup>2+</sup>

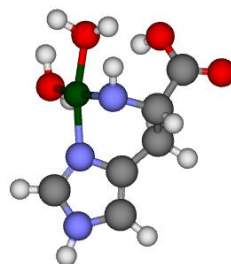

[Cu(his)(H<sub>2</sub>O)<sub>2</sub>]<sup>2+</sup>

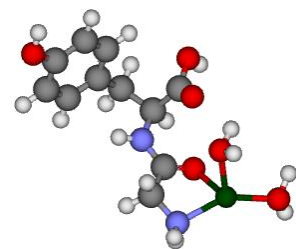

[Cu(GY)(H<sub>2</sub>O)<sub>2</sub>]<sup>2+</sup>

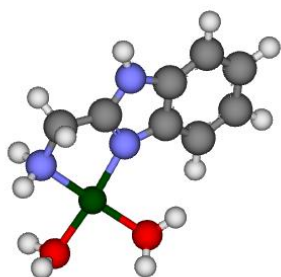

[Cu(ambz)(H<sub>2</sub>O)<sub>2</sub>]<sup>2+</sup>

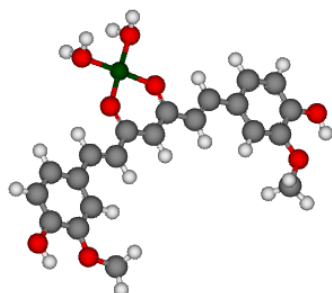

[Cu(cu)(H<sub>2</sub>O)<sub>2</sub>]<sup>2+</sup>

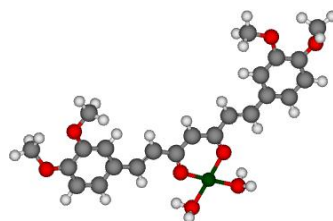

[Cu(dmcu)(H<sub>2</sub>O)<sub>2</sub>]<sup>2+</sup>

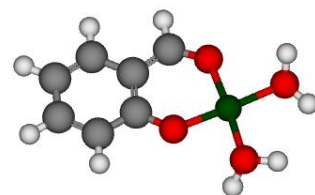

[Cu(sa)(H<sub>2</sub>O)<sub>2</sub>]<sup>2+</sup>

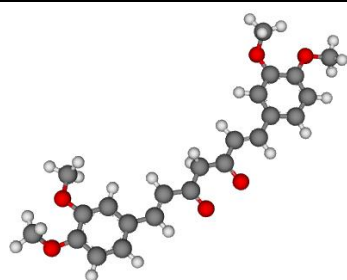

Dimethoxycurcumin

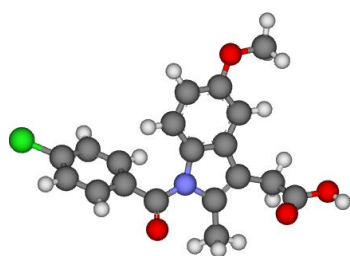

Indomethacin

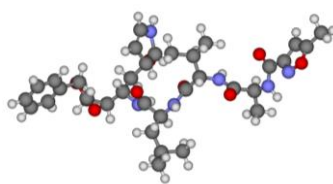

N3

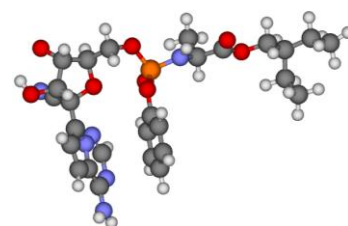

Remdesivir

**Table S2.** Binding affinities, inhibition constants for docked M<sup>pro</sup>-ligand adducts.

| <b>Casiopinas®</b> |                            |                |        | <b>Monochelates</b>                                         |                               |                |        |
|--------------------|----------------------------|----------------|--------|-------------------------------------------------------------|-------------------------------|----------------|--------|
| Compound           | $\Delta G_U$<br>(kcal/mol) | Ki<br>(mmol/L) | log Ki | Compound                                                    | $\Delta G_U$<br>(kcal/mol)    | Ki<br>(mmol/L) | log Ki |
| Cas-II-ambz        | -8,84                      | 0,33           | -0,48  | [Cu(ambz)(H <sub>2</sub> O) <sub>2</sub> ] <sup>2+</sup>    | -4,99                         | 220,20         | 2,34   |
| Cas-IV-cu          | -8,76                      | 0,38           | -0,42  | [Cu(cu)(H <sub>2</sub> O) <sub>2</sub> ] <sup>+</sup>       | -8,29                         | 0,83           | -0,08  |
| Cas-II-5ClSa       | -9,25                      | 0,18           | -0,74  | [Cu(sa)(H <sub>2</sub> O) <sub>2</sub> ] <sup>+</sup>       | -5,54                         | 87,29          | 1,94   |
| Cas-IV-sa          | -8,64                      | 0,46           | -0,34  | [Cu(tyr)(H <sub>2</sub> O) <sub>2</sub> ] <sup>+</sup>      | -4,44                         | 102,95         | 2,01   |
| Cas-II-tyr         | -8,58                      | 0,51           | -0,29  | [Cu(GY)(H <sub>2</sub> O) <sub>2</sub> ] <sup>+</sup>       | -5,99                         | 40,76          | 1,61   |
| Cas-II-cu          | -8,53                      | 0,56           | -0,25  | [Cu(in)(H <sub>2</sub> O) <sub>2</sub> ] <sup>+</sup>       | -9,12                         | 0,21           | -0,68  |
| Cas-IVGY           | -8,51                      | 0,58           | -0,24  | [Cu(his)(H <sub>2</sub> O) <sub>2</sub> ] <sup>+</sup>      | -4,47                         | 532,22         | 2,73   |
| Cas-IV5ClSa        | -8,37                      | 0,73           | -0,14  | [Cu(gly)(H <sub>2</sub> O) <sub>2</sub> ] <sup>+</sup>      | -3,92                         | 1340           | 3,13   |
| Cas-IV-ambz        | -8,36                      | 0,75           | -0,13  | [Cu(ser)(H <sub>2</sub> O) <sub>2</sub> ] <sup>+</sup>      | -5,27                         | 136,08         | 2,13   |
| Caa-II-in          | -8,17                      | 1,03           | 0,01   | [Cu(dmCu)(H <sub>2</sub> O) <sub>2</sub> ] <sup>+</sup>     | -8,02                         | 1,32           | 0,12   |
| Cas-II-sa          | -8,13                      | 1,09           | 0,04   | [Cu(acac)(H <sub>2</sub> O) <sub>2</sub> ] <sup>+</sup>     | -5,30                         | 129,65         | 2,11   |
| Cas-IV-tyr         | -8,13                      | 1,31           | 0,12   | [Cu(tfa)(H <sub>2</sub> O) <sub>2</sub> ] <sup>+</sup>      | -4,77                         | 319,23         | 2,50   |
| Cas-IV-his         | -7,94                      | 1,50           | 0,18   | [Cu(hfa)(H <sub>2</sub> O) <sub>2</sub> ] <sup>+</sup>      | -4,27                         | 735,56         | 2,87   |
| Cas-IV-in          | -7,80                      | 1,92           | 0,28   | [Cu(47dmfen)(H <sub>2</sub> O) <sub>2</sub> ] <sup>2+</sup> | -7,14                         | 5,85           | 0,77   |
| Cas-II-gly         | -7,79                      | 1,94           | 0,29   | [Cu(44dmbp)(H <sub>2</sub> O) <sub>2</sub> ] <sup>2+</sup>  | -7,14                         | 5,87           | 0,77   |
| Cas-IV-dmCu        | -7,59                      | 2,73           | 0,44   | <b>BAHD</b>                                                 |                               |                |        |
| Cas-III-ia         | -7,56                      | 2,86           | 0,46   | Compound                                                    | DG <sub>U</sub><br>(kcal/mol) | Ki<br>(mmol/L) | log Ki |
| Cas-III-Ea         | -7,53                      | 3,04           | 0,48   | Indomethacin                                                | -7,42                         | 3,62           | 0,56   |
| Cas-III-Ea-tfa     | -7,51                      | 3,14           | 0,50   | Curcumin                                                    | -5,74                         | 62,42          | 1,80   |
| Cas-II-GY          | -7,38                      | 3,91           | 0,59   | Dimetoxycurcumin                                            | -5,42                         | 107,07         | 2,03   |
| Cas-III-ia-tfa     | -7,37                      | 3,94           | 0,60   | <b>M<sup>pro</sup> inhibitors</b>                           |                               |                |        |
| Cas-III-Ea-hfa     | -7,32                      | 4,31           | 0,63   | Compound                                                    | DG <sub>U</sub><br>(kcal/mol) | Ki<br>(mmol/L) | log Ki |
| Cas-II-ser         | -7,22                      | 5,12           | 0,71   | Bocepevir                                                   | -8,44                         | 0,65           | -0,19  |
| Cas-II-hys         | -7,20                      | 5,23           | 0,72   | Remdesivir                                                  | -7,17                         | 5,53           | 0,74   |
| Cas-IV-gly         | -7,13                      | 5,93           | 0,77   | N3                                                          | -4,89                         | 262,34         | 2,42   |
| Cas-IV-ser         | -7,05                      | 6,77           | 0,83   |                                                             |                               |                |        |
| Cas-III-ia-hfa     | -7,03                      | 6,98           | 0,84   |                                                             |                               |                |        |
| Cas-II-dmCu        | -7,01                      | 7,23           | 0,86   |                                                             |                               |                |        |

**Figure S2.** Estimated energy binding of Cas-M<sup>pro</sup> complexes

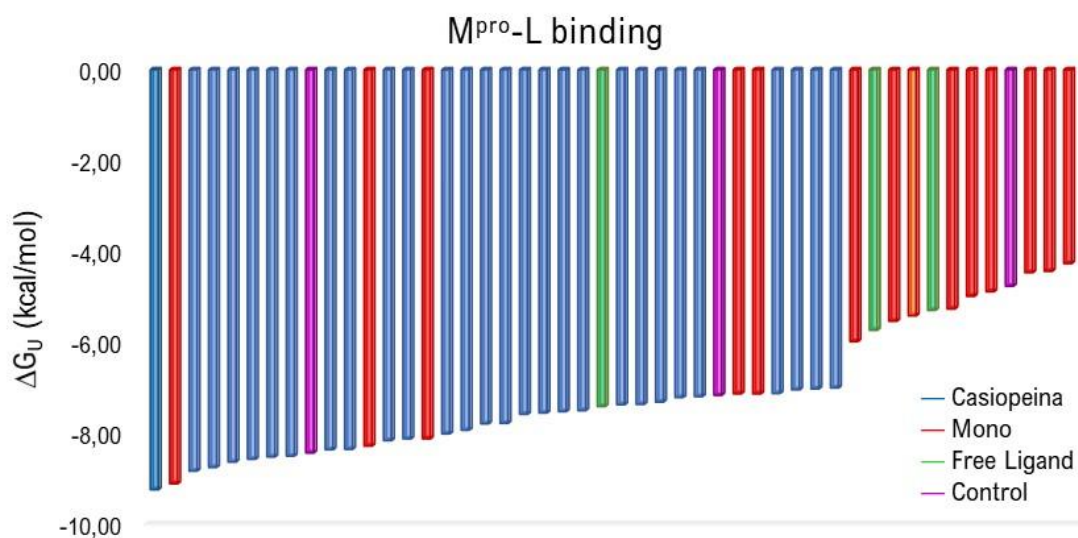

**Figure S3.** 2D Diagrams of stabilizing interactions of 2-aminomethylbenzimidazol and indothetacin derivatives with M<sup>pro</sup> active site. CasII-ambz(top-left), CasIV-ambz(top-right), CasII-in(bottom-left) and CasIV-in(bottom-right)

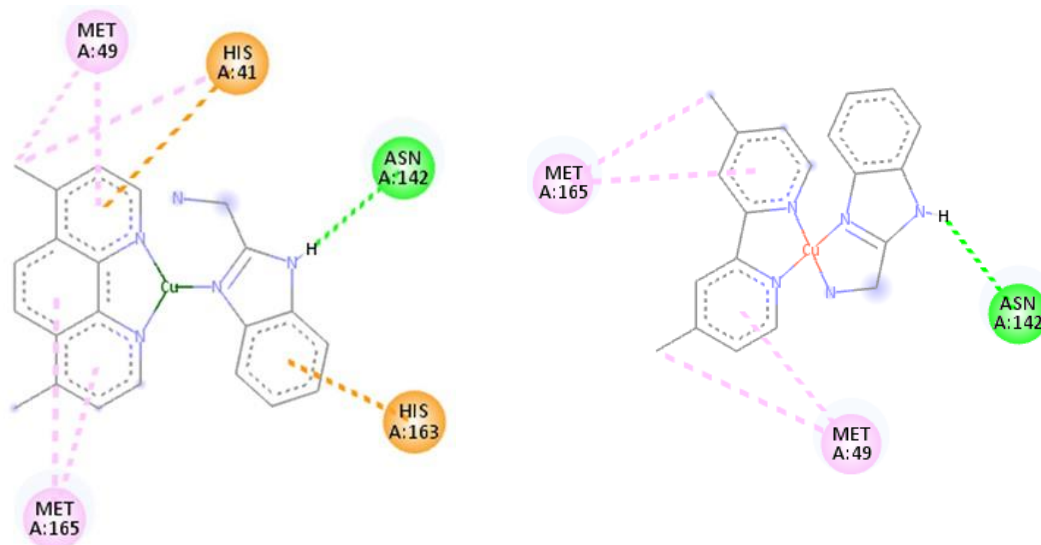

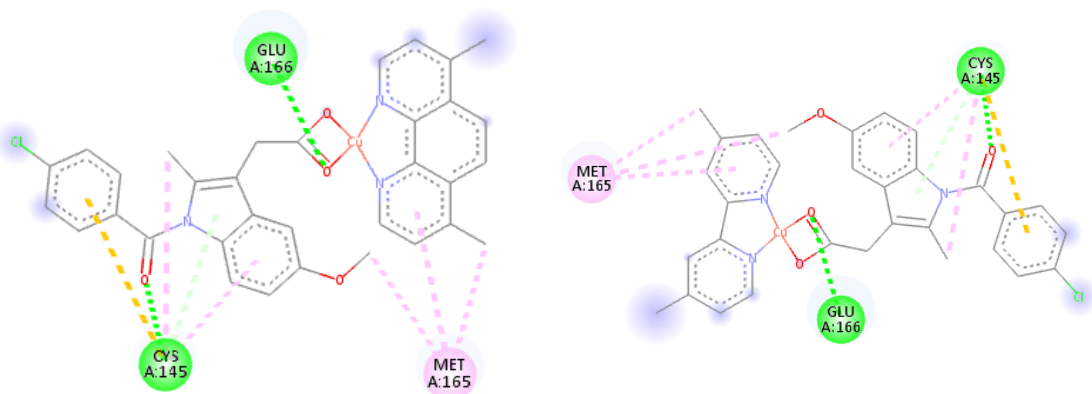

| Compound   | $\Delta G_U$ (Kcal/mol) | Ki (mmol/L) |
|------------|-------------------------|-------------|
| CasII-ambz | -8.84                   | 0.33        |
| CasIV-ambz | -8.36                   | 0.75        |
| CasII-in   | -8.17                   | 1.03        |
| CasIV-in   | -7.80                   | 1.92        |

**Figure S4.** 2D Diagrams of stabilizing interactions of some best rated copper compounds. [Cu(indomethacin)(H<sub>2</sub>O)<sub>2</sub>]<sup>+</sup> (top-left), CasII-tyr (top-right) and CasIV-sa (bottom).

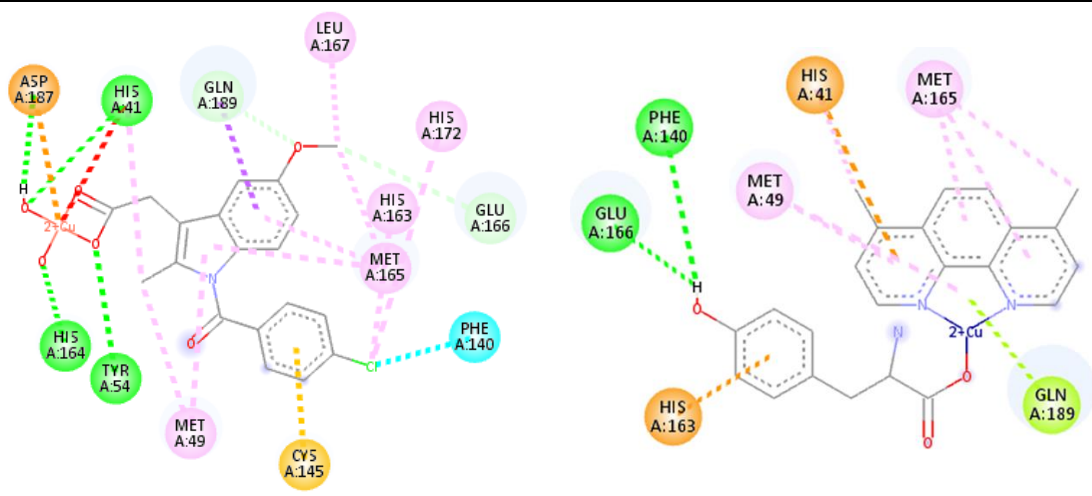



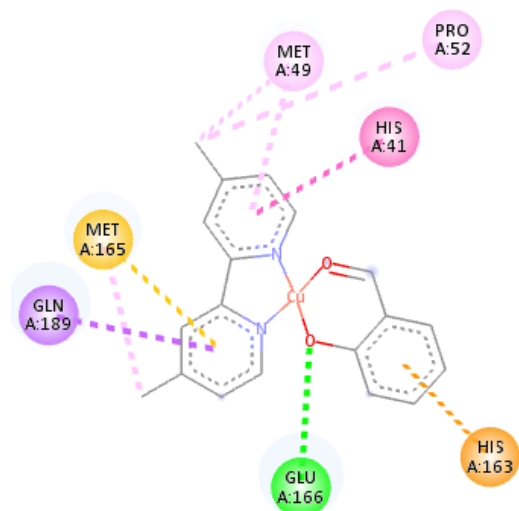

**Figure S5.** Stabilizing interactions in CasII-dmCu:M<sup>Pro</sup>. Docking simulations suggest the presence of Cu-O(Gln189) coordination bond.

---

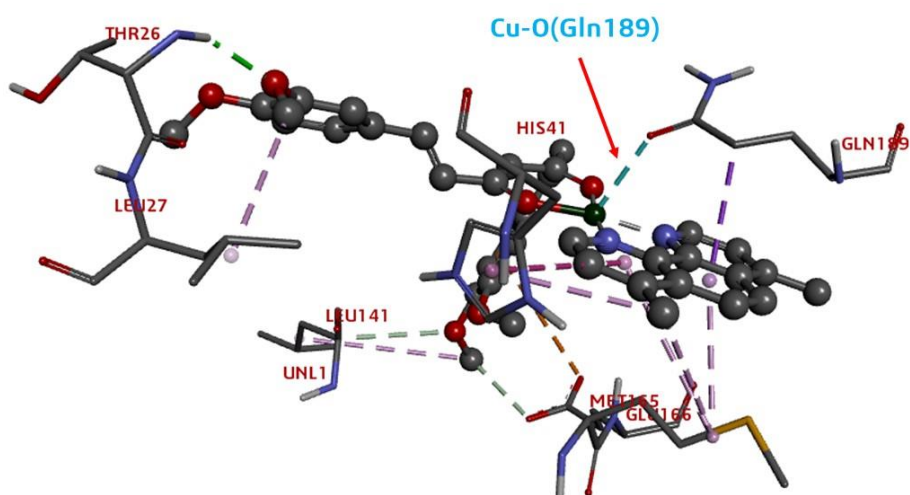

**Figure S6.** Close-ups of the ONIOM high layer for the complexes of  $M^{\text{Pro}}_{\text{pocket}}$  with a) CasIV-sa, b) CasII-tyr and c) CasIV-ambz

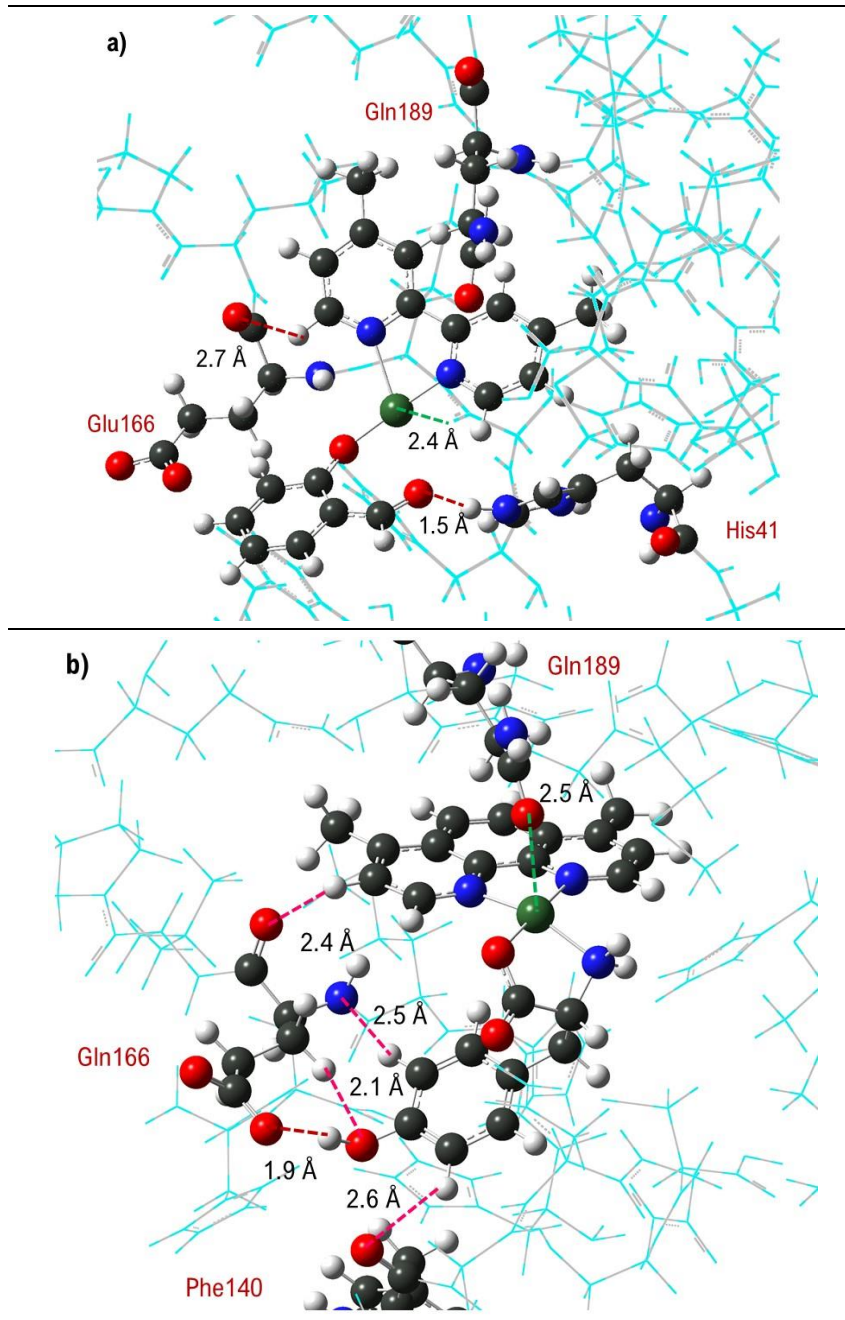

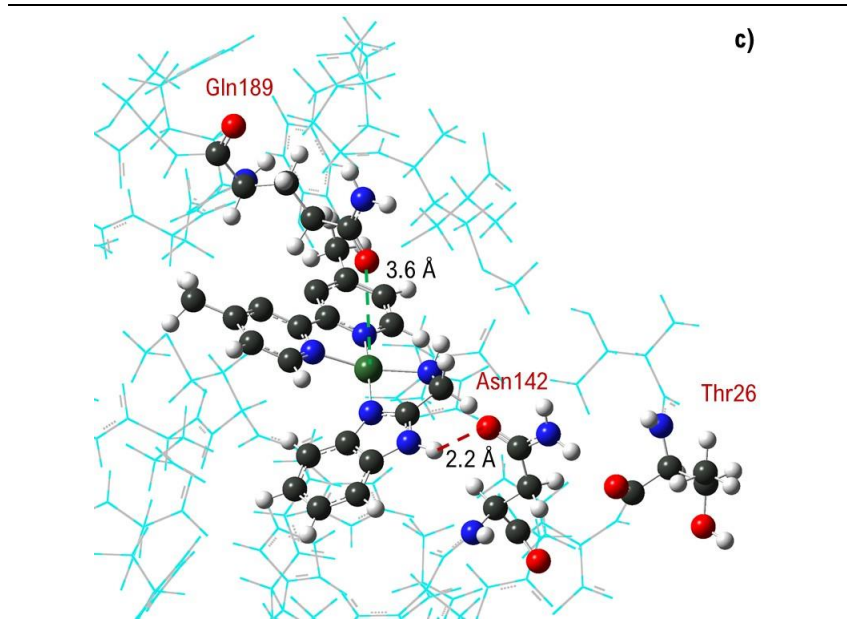

Supplement: d2nj01480g1.pdf [file d2nj01480g1.pdf]
